# Supplementary material
Source: PubMed Central journal article supplement (PMC3674774)
Supplement: NIHMS402441-supplement-Supplementary_figures_and_legends.pdf [file NIHMS402441-supplement-Supplementary_figures_and_legends.pdf]

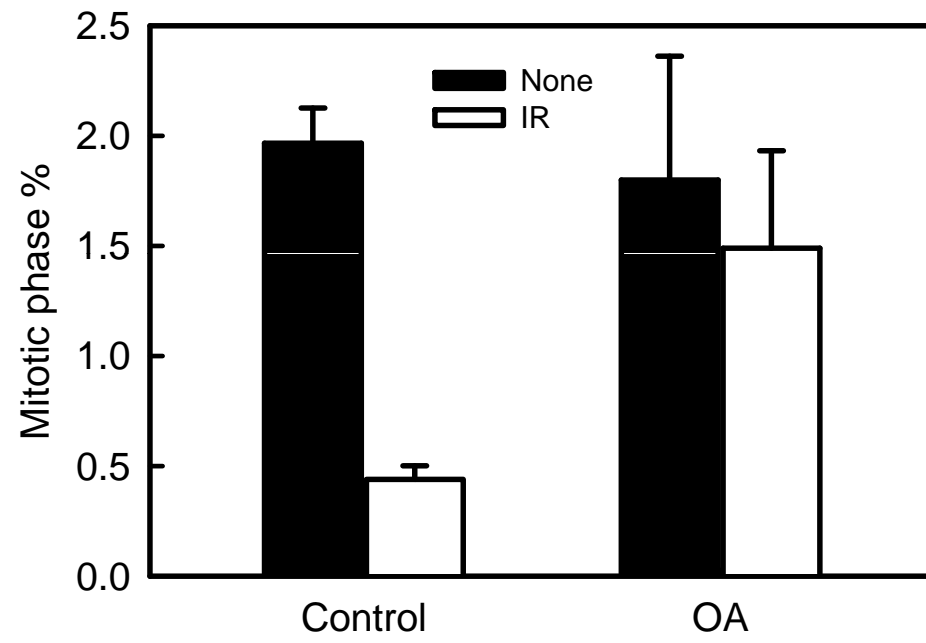

Supplementary Figure 1

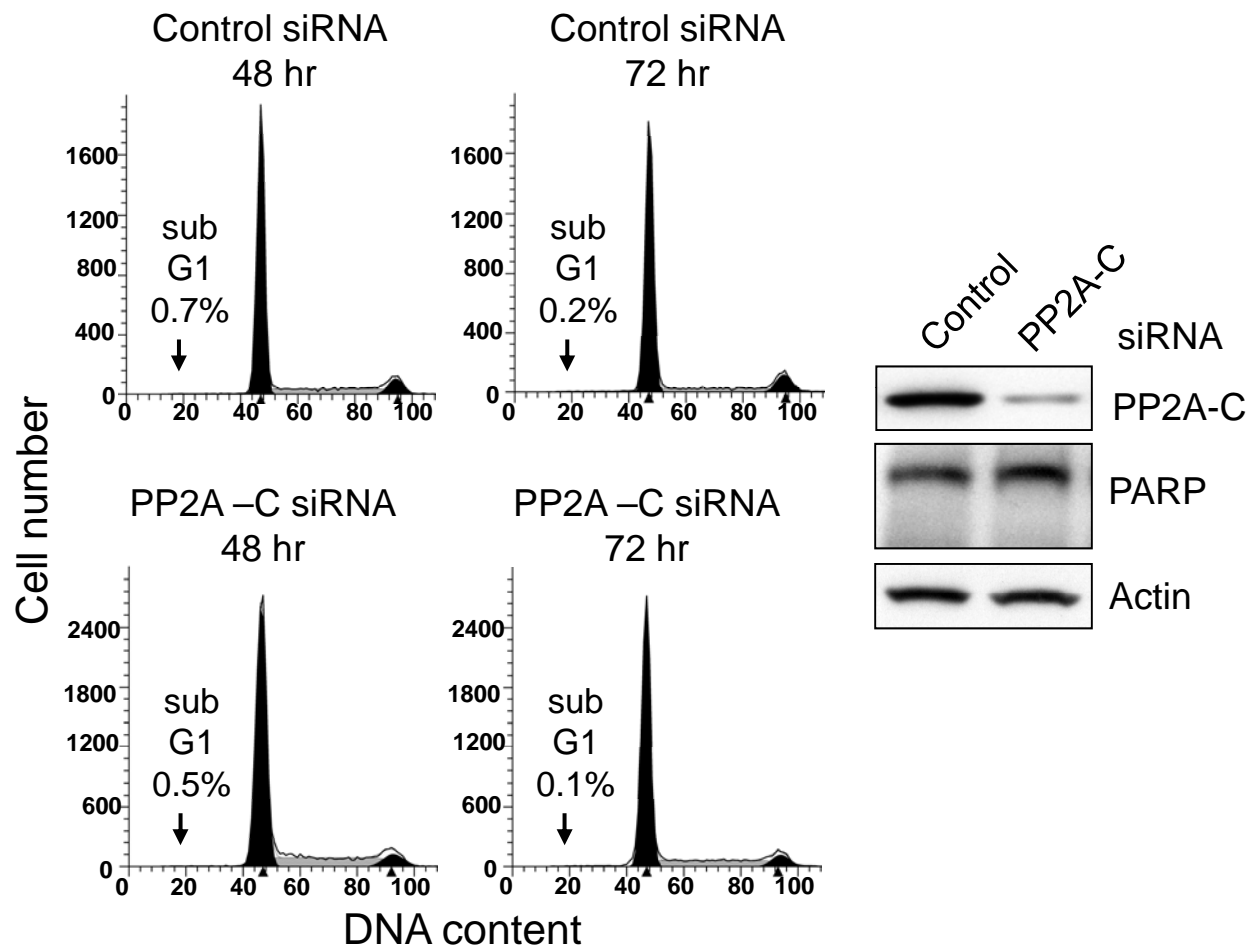

Supplementary Figure 2

## SUPPLEMENTARY FIGURE LEGENDS

**Figure 1** The effect of PP2A inhibition on mitotic cells in MCF-7 cells following IR exposure. MCF-7 cells were exposed 20-Gy IR in the presence or absence of 0.5  $\mu$ M OA and followed by 2hr incubation. The cells were fixed, stained with both PI and anti-phospho-Histone H3 antibody, and analyzed for mitotic cells by FACS, which contain both 4N-DNA-content and phospho-Histone H3. The results depict the percentage of mitotic cells and are shown as mean $\pm$ s.d. of triplicate samples.

**Figure 2** Knockdown of PP2A catalytic subunit by siRNA does not induce apoptosis in MCF-7 breast cancer cells. *Left panel:* Cells were transfected with non-targeting control siRNA (*Control siRNA*) or siRNA targeting PP2A catalytic subunit  $\text{Ca/C}\beta$  (*PP2A-C siRNA*) for the indicated times and analyzed for DNA content by FACS. *Right panel:* Cells were transfected with non-targeting control siRNA (*Control*) or siRNA targeting PP2A-Ca/C $\beta$  (*PP2A-C*) for 3 days and analyzed for levels of PP2A-C, Poly ADP-ribose polymerase (PARP) and Actin by immunoblotting.
